# Supplementary material for: Removal of Pb from Contaminated Kaolin by Pulsed Electrochemical Treatment Coupled with a Permeable Reactive Barrier: Tuning Removal Efficiency and Energy Consumption
Source: MDPI journal article supplement (doi:10.3390/toxics11120961), 2023-11-27
Supplement: s1 [file s1]

**Table S1.** The comparison of lead removal efficiency and energy consumption under different electrochemical treatment conditions

| Soil type        | Research method            | Catholyte enhancer                                    | Anolyte enhancer                                      | Pulse interval   | Initial Pb concentration                        | Treatment time | Removal efficiency (%)                | Energy consumption         | Reference                 |
|------------------|----------------------------|-------------------------------------------------------|-------------------------------------------------------|------------------|-------------------------------------------------|----------------|---------------------------------------|----------------------------|---------------------------|
| Mixed Clay Soils | PECT                       | HNO <sub>3</sub>                                      | NaOH                                                  | 9 h ON/1 h OFF   | 100 mg/kg                                       | 504 h          | 17 (Pb)<br>62.41 (Cu)                 | 1151.58 kwh/m <sup>3</sup> | (Usman et al., 2012) [1]  |
| Kaolin           | PECT                       | 0.2 mol/L Citric acid<br>0.05 mol/L CaCl <sub>2</sub> | 0.2 mol/L Citric acid<br>0.05 mol/L CaCl <sub>2</sub> | 12 h ON/12 h OFF | 240.8 mg/kg                                     | 705 h          | 93.5 (Pb)                             | 124.8 kWh/m <sup>3</sup>   | (Yuan et al., 2017) [2]   |
| Farm soil        | AACE with EDTA leaching    | EDTA                                                  | EDTA                                                  | Constant voltage | 10000 ppm (Cu)<br>1000 ppm (Pb)<br>100 ppm (Cd) | 6 h            | 71.2 (Cu)<br>95.3 (Pb)<br>98.8 (Cd)   | Not mentioned              | (Xu et al., 2019) [3]     |
| Paddy soil       | ECT                        | 0.1 N HNO <sub>3</sub>                                | 0.1N NaOH                                             | Constant voltage | 298.7 mg/kg                                     | 720 h          | 60.1 (Cu)<br>75.7 (Pb)<br>43.1 (As)   | 1204.6 kWh/ton             | (Ryua et al., 2011) [4]   |
| Farmland soil    | ECT with anode approaching | 0.1 mol/L KNO <sub>3</sub>                            | 0.1 mol/L KNO <sub>3</sub>                            | Constant voltage | 853.3 mg/kg                                     | 219 h          | 31.3 (Pb)<br>25.93 (Cd)               | 227 kWh/t                  | (Zhang et al., 2016) [5]  |
| Calcareous soil  | ECT                        | 0.01 mol/L EDTA                                       | 0.01 mol/L EDTA                                       | Constant voltage | 250 mg/kg                                       | 120 h          | 40.11 (Zn)<br>43.10 (Cd)<br>24.7 (Pb) | Not mentioned              | (Beyrami 2021) [6]        |
| Kaolin           | ECT                        | 0.5 N H <sub>2</sub> SO <sub>4</sub>                  | 0.005N H <sub>2</sub> SO <sub>4</sub>                 | Constant voltage | 1438 mg/kg                                      | 96 h           | 49.8 (Pb)                             | Not mentioned              | (Kim et al., 2001) [7]    |
| Kaolin           | ECT                        | 0.1 N EDTA                                            | 0.1N EDTA                                             | Constant voltage | 1167.9 mg/kg                                    | 10 h           | 65.1% (Pb)                            | 78.3 kWh/m <sup>3</sup>    | (Taneja et al., 2023) [8] |
| Kaolin           | ECT                        | EDTA-2Na and acetic acid                              | EDTA-2Na and acetic acid                              | Constant voltage | 500 mg/kg                                       | 96 h           | 76.4% (Pb)                            | Not mentioned              | (Liu et al., 2023) [9]    |
| Kaolin           | ECT with PRB               | 2 M KNO <sub>3</sub>                                  | 2 M KNO <sub>3</sub>                                  | Constant voltage | 296.5 ± 6.3 mg/kg                               | 192 h          | 62.2 ± 2.5% (Pb)                      | Not mentioned              | (Liu et al., 2022) [10]   |

|        |               |                      |                 |                                                                           |            |       |                                                                    |                                                                                                            |                          |
|--------|---------------|----------------------|-----------------|---------------------------------------------------------------------------|------------|-------|--------------------------------------------------------------------|------------------------------------------------------------------------------------------------------------|--------------------------|
| Kaolin | ECT with PRB  | Not mentioned        | Not mentioned   | Constant voltage                                                          | 1000 mg/kg | 120 h | 92.6% (Pb)                                                         | Not mentioned                                                                                              | (Zhou et al., 2021) [11] |
| Kaolin | PECT with PRB | 0.3mol/L acetic acid | distilled water | 3 s ON/3s OFF<br>1min ON/1min OFF<br>30 min ON/30min OFF<br>6 h ON/6h OFF | 1153 mg/kg | 204 h | 89.5%PC<br>b-1m (91%)<br>PCb-30m (92.9%)<br>PCb-6h (91.9%)<br>(Pb) | 177.6 kWh/m <sup>3</sup><br>197.9 kWh/m <sup>3</sup><br>271.6 kWh/m <sup>3</sup><br>296 kWh/m <sup>3</sup> | Present study            |

ECT: Electrochemical treatment; PECT: Pulse electrochemical treatment; AACE: Asymmetrical alternating current electrochemistry

## References

1. Usman, A.-K.; Mu'azu, N.-D.; Lukman, S.; Essa, M.; Bukhari, A.A.; Al-Malack, M.H. Removal of Lead and Copper from Contaminated Mixed Clay Soils Using Pulsed Electrokinetics. *Soil Sediment Contam. Int. J.* **2020**, *29*, 465–480. <https://doi.org/10.1080/15320383.2020.1743969>.
2. Yuan, L.; Xu, X.; Li, H.; Wang, Q.; Wang, N.; Yu, H. The influence of macroelements on energy consumption during periodic power electrokinetic remediation of heavy metals contaminated black soil. *Electrochim. Acta.* **2017**, *235*, 604–612. <https://doi.org/10.1016/j.electacta.2017.03.142>.
3. Xu, J.; Liu, C.; Hsu, P.-C.; Zhao, J.; Wu, T.; Tang, J.; Liu, K.; Cui, Y. Remediation of heavy metal contaminated soil by asymmetrical alternating current electrochemistry. *Nat. Commun.* **2019**, *10*(1), 2440. <https://doi.org/10.1038/s41467-019-10472-x>.
4. Ryu, B.G.; Park, G.-Y.; Yang, J.-W.; Baek, K. Electrolyte conditioning for electrokinetic remediation of As, Cu, and Pb-contaminated soil. *Sep. Purif. Technol.* **2011**, *79*, 170–176. <https://doi.org/10.1016/j.seppur.2011.02.025>.
5. Zhang, P.; Jin, C.; Sun, Z.; Huang, G.; She, Z. Assessment of Acid Enhancement Schemes for Electrokinetic Remediation of Cd/Pb Contaminated Soil. *WATER AIR SOIL POLL.* **2016**, *227*(6), 217. <https://doi.org/10.1007/s11270-016-2879-y>.
6. Beyrami, H. Effect of different treatments on electrokinetic remediation of Zn, Pb and Cd from a contaminated calcareous soil. *Chin. J. Chem. Eng.* **2021**, *38*, p. 255–265. <https://doi.org/10.1016/j.cjche.2020.09.011>.
7. Kim, S.; Moon, S.-H.; Kim, K.-W. Removal of Heavy Metals from Soils using Enhanced Electrokinetic Soil Processing. *WATER AIR SOIL POLL.* **2001**, *125*, p. 259–272. <https://doi.org/10.1023/A:1005283001877>.
8. Taneja, S.; Karaca, O.; Haritash, A.-K. Treatment of Pb-contaminated soil by electrokinetics: Enhancements by varying voltage, chelant, and electrode material. *J. Geochem. Explor.* **2023**, *250*, 107240. <https://doi.org/10.1016/j.gexplo.2023.107240>.
9. Liu, Y.; Zhuang, Y.-F.; Xiao, F.; Liu, Z. Mechanism for reverse electroosmotic flow and its impact on electrokinetic remediation of lead-contaminated kaolin. *Acta Geotech.* **2023**, *18*, 124885. <https://doi.org/10.1007/s11440-022-01640-3>.
10. Liu, Q.; Zhang, Q.; Jiang, S.; Du, Z.; Zhang, X.; Chen, H.; Cao, W.; Nghiem, L.-D.; Ngo, H.-H. Enhancement of lead removal from soil by in-situ release of dissolved organic matters from biochar in electrokinetic remediation. *J. Cleaner Prod.* **2022**, *361*, 132294. <https://doi.org/10.1016/j.jclepro.2022.132294>.
11. Zhou, H.; Liu, Z.; Li, X.; Xu, J. Remediation of lead (II)-contaminated soil using electrokinetics assisted by permeable reactive barrier with different filling materials. *J. Hazard. Mater.* **2021**, *408*, 124885. <https://doi.org/10.1016/j.jhazmat.2020.124885>.
